# Supplementary material
Source: PubMed Central journal article supplement (PMC3585736)
Supplement: Supp_Table1.pdf [file Supp_Table1.pdf]

## Supplementary Data

SUPPLEMENTARY TABLE S1. ANTIBODIES LIST USED FOR IMMUNOCYTOCHEMISTRY AND IMMUNOHISTOCHEMISTRY

| <i>Markers</i> | <i>Antibody list</i>    | <i>Vendor</i> | <i>Catalog No.</i> |
|----------------|-------------------------|---------------|--------------------|
| Pluripotency   | OCT4                    | Santa Cruz    | SC-9081            |
| Pluripotency   | SOX2                    | StemCell      | 01438              |
| Pluripotency   | NANOG                   | Peprotech     | 500-P236           |
| Pluripotency   | SSEA-1-DyLight549       | Stemgent      | 09-0083            |
| Endoderm       | AFP                     | Sigma         | A8452              |
| Endoderm       | SOX17                   | Santa Cruz    | SC-20099           |
| Mesoderm       | DES                     | Neomarks      | MS-376             |
| Mesoderm       | VIM                     | Santa Cruz    | SC-7557            |
| Ectoderm       | TUJ1                    | Covance       | MMS-435P           |
| Ectoderm       | GFAP                    | Dako          | Z033401            |
| Secondary      | Anti-rabbit-IgG-Cy3     | Invitrogen    | A10520             |
| Secondary      | Anti-mouse-IgG-Alexa488 | Invitrogen    | A11001             |
