# Supplementary material
Source: PubMed Central journal article supplement (PMC3585736)
Supplement: Supp_Table2.pdf [file Supp_Table2.pdf]

SUPPLEMENTARY TABLE S2. PRIMERS LIST USED FOR REAL-TIME  
AND CONVENTIONAL REVERSE TRANSCRIPTION-POLYMERASE CHAIN REACTION

| <i>Markers</i> | <i>Target</i> | <i>Sequences (5' → 3')</i>                               |
|----------------|---------------|----------------------------------------------------------|
| Pluripotency   | Endo-OCT4     | F: GTCACCACTCTGGGCTCTCC<br>R: TCCCCGAAACTCCCTGCCTC       |
| Pluripotency   | Endo-SOX2     | F: GTCCCAGCACTACCAGAGCG<br>R: CTTACTCTCCTCCATTTCCTCG     |
| Pluripotency   | NANOG         | F: CCTGCATCCTTGCCAATGTC<br>R: TCCGGGCTGTCTGAGTAAG        |
| Pluripotency   | LIN28         | F: GACCACCATGCCAAGGAATG<br>R: CCTCCCGAAAGTAGGCTGGC       |
| Pluripotency   | PODXL         | F: GCACTCAGCAAAGGCCACCTT<br>R: CCACCTCTTTGAGCTCGTCCCA    |
| Pluripotency   | DPPA5         | F: GACGCTGCCAGGACGGAAAGAT<br>R: GCCCGAGGATTCCAGAACCTTT   |
| Pluripotency   | FGF5          | F: TTCCTCAGCCACCTGATCCTCA<br>R: CGGAGGAGACGGAGGAAGAAGA   |
| Pluripotency   | REX1          | F: TGGAGAGTGACCTGCTGGCC<br>R: CCCGTCCACGTTGTCCTGG        |
| Pluripotency   | BRACHYURY     | F: TGCAGTACCGAGTGGACCACCT<br>R: GCCGTTCTTGGTCACGATCATC   |
| Pluripotency   | LAMP1         | F: TCCGCAGCGAGAGTGTCACTCT<br>R: TCCCAATGGTGGCCTGAAGTG    |
| Pluripotency   | TERT          | F: TCCCTTCTCAAAGCCAGGAACG<br>R: TGTGCCTTGGCCTGCTGG       |
| Control        | ACTB          | F: GATGACGATATCGCTGCGCTTGTG<br>R: CATCACGATGCCAGTGGTGCGG |
| Transgene      | Tg-Oct3/4     | F: CACTTTGGCACCCAGGCTA<br>R: CCCTTTTTCTGGAGACTAAATAAA    |
| Transgene      | Tg-Sox2       | F: GACCTCCGGACATGATCAG<br>R: CCCTTTTTCTGGAGACTAAATAAA    |
| Transgene      | Tg-Klf4       | F: GACGGCTGTGGGTGGAAAT<br>R: CCCTTTTTCTGGAGACTAAATAAA    |
| Transgene      | Tg-c-Myc      | F: GCCCCCAAGGTAGTGATCCT<br>R: CCCTTTTTCTGGAGACTAAATAAA   |
| Endoderm       | CXCR4         | F: GTCTGTGGCAGACCCTCCTC<br>R: GCTGAAACTGGAACACCACC       |
| Endoderm       | SOX17         | F: CGCACGGAATTTGAACAGTA<br>R: CGTTCAAGTGGCAGACAAA        |
| Mesoderm       | MSX1          | F: GGCCATTTTTCCGGTGGGAGG<br>R: TCTTGTGCTTGGCAGGGTG       |
| Mesoderm       | BMP2          | F: CTTCTAGCGTTGCTGCTTCCCC<br>R: CAGGCCGAACATGCTGAGCA     |
| Ectoderm       | TUBB          | F: GCACACTGCTCATCAACAAG<br>R: TCTTGCTCCTTCATGGAC         |
| Ectoderm       | NCAM          | F: AGGCAGAGCATAGTGAATGC<br>R: AGGCTTCACAGGTCAGAGTG       |
